## RESEARCH ARTICLE

# Osteoblasts pattern endothelium and somatosensory axons during zebrafish caudal fin organogenesis

Rosalind G. Bump<sup>1,2</sup>, Camille E. A. Goo<sup>1</sup>, Emma C. Horton<sup>1,\*</sup> and Jeffrey P. Rasmussen<sup>1,3,‡</sup>

## ABSTRACT

Skeletal elements frequently associate with vasculature and somatosensory nerves, which regulate bone development and homeostasis. However, the deep, internal location of bones in many vertebrates has limited *in vivo* exploration of the neurovascular-bone relationship. Here, we use the zebrafish caudal fin, an optically accessible organ formed of repeating bony ray skeletal units, to determine the cellular relationship between nerves, bones and endothelium. In adult zebrafish, we establish the presence of somatosensory axons running through the inside of the bony fin rays, juxtaposed with osteoblasts on the inner hemiray surface. During development we show that the caudal fin progresses through sequential stages of endothelial plexus formation, bony ray addition, ray innervation and endothelial remodeling. Surprisingly, the initial stages of fin morphogenesis proceed normally in animals lacking either fin endothelium or somatosensory nerves. Instead, we find that *sp7*<sup>+</sup> osteoblasts are required for endothelial remodeling and somatosensory axon innervation in the developing fin. Overall, this study demonstrates that the proximal neurovascular-bone relationship in the adult caudal fin is established during fin organogenesis and suggests that ray-associated osteoblasts pattern axons and endothelium.

**KEY WORDS:** *Danio rerio*, Bone, Somatosensory neuron, Neurovascular congruence, VEGFR, Developmental biology

## INTRODUCTION

Vertebrates display a vast diversity of form and function but share a common biological organization – bony structures innervated by dense networks of somatosensory nerves and blood vessels. The neurovascular-bone connection is a long-standing paradigm in vertebrate biology, noted as early as the 19th century (Berthold, 1831). This relationship is observed in diverse species with convergent, innervated features, such as skeletal long bones (Tomlinson et al., 2016) and teeth (Shadad et al., 2019), as well as divergent, specialized features, such as deer antlers (Wislocki and Singer, 1946) and elephant tusks (Weissengruber et al., 2005). Sensory nerves detect stimuli that are crucial for survival (e.g. pain) and blood vessels deliver oxygen and essential nutrients to the bones.

Growing evidence indicates that vasculature and peripheral nerves play key roles in bone development and homeostasis. For example, the development of cranial foramina, or passageways of the skull, has been proposed to rely on sensory nerves and vasculature to restrict ossification to discrete domains (Akbareian et al., 2015). Additionally, damage to bony structures results in mispatterned, incomplete repair when the tissue is denervated, as observed in deer antlers (Suttie and Fennessy, 1985), mouse femurs (Chen et al., 2019) and axolotl teeth (Makanae et al., 2020). In humans with congenital insensitivity to pain, a condition arising from an incomplete peripheral nervous system, patients experience significant musculoskeletal disorders, including repeated fractures (Bar-On et al., 2002; Mifsud et al., 2019). Similarly, inhibition of angiogenesis limits bone repair in several contexts (Hausman et al., 2001; Street et al., 2002). Taken together, these data strongly indicate the necessity of a functional neurovascular unit to promote the morphogenesis and maintenance of osteogenic tissue.

Despite the importance of the neurovascular-bone axis for organismal form and function, the deep, internal localization of bones has presented a barrier to *in vivo* study in mammalian models. By contrast, the superficial bony structures of teleost (ray-finned) fish offer an attractive alternative to overcome the physical barriers to studying this highly conserved relationship. In particular, the teleost caudal fin is a thin, optically accessible organ, composed of a reproducibly patterned set of dermal bones known as fin rays (lepidotrichia) (Becerra et al., 1983; Bird and Mabee, 2003; Montes et al., 1982). In adult zebrafish, the caudal fin rays associate with blood vessels and contain axon-associated Schwann cells (Lee et al., 2013; Xu et al., 2014). However, the identity of the fin nerves and their relationship with other tissues during fin morphogenesis remains poorly understood.

Here, we leverage the imaging and genetic advantages of zebrafish to investigate the establishment of the neurovascular-bone relationship in caudal fin bony rays. We show that somatosensory axons innervate the fin rays in close association with ray osteoblasts. We further establish the developmental timing of ray innervation relative to endothelial and osteoblast remodeling during fin morphogenesis. Surprisingly, we report that neither bony rays nor axon development depends on the presence of an endothelial plexus within the caudal fin. The initial stages of fin organogenesis also proceed normally in the absence of somatosensory nerves. However, we find that conditional ablation of osteoblasts disrupts endothelial and axon morphogenesis. Together, our findings point to a central role of osteoblasts in establishing the precise patterning of endothelium and axons during fin organogenesis.

## RESULTS

### Adult peripheral axons innervate each bony ray of the caudal fin

The adult zebrafish caudal fin has a highly stereotyped and well-described bony anatomy (Fig. 1A). The bi-lobed fin contains

<sup>1</sup>Department of Biology, University of Washington, Seattle, WA 98195, USA.

<sup>2</sup>Molecular and Cellular Biology Program, University of Washington, Seattle, WA 98195, USA. <sup>3</sup>Institute for Stem Cell and Regenerative Medicine, University of Washington, Seattle, WA 98109, USA.

\*Present address: Developmental Biology and Stem Cell Program, University of California, San Francisco, CA 94143, USA.

‡Author for correspondence (rasmuss@uw.edu)

DOI: 10.1242/dev.200172; R.G.B., 0000-0002-7043-7481; J.P.R., 0000-0001-6997-3773

approximately 18 main bony rays, with each ray built from individual bone segments. With the exception of the dorsal-most and ventral-most rays, each bony ray bifurcates (branches into two) as the rays extend distally (Fig. 1A,B). The bony rays do not form solid cylinders of calcified bone, but rather comprise two concave hemirays. The caudal fin contains a wide range of cell types with diverse developmental origins, both in the inter-ray space and within the hemirays themselves. For example, a monolayer of bone-depositing osteoblasts covers each hemiray; an artery runs through the middle of each ray, and veins flank the dorsal and ventral margins of each ray (Xu et al., 2014); previous analyses of cell lineages within the caudal fin identified pigment cells, fibroblasts and neural crest-derived Schwann cells running through the rays (Lee et al., 2013; Tu and Johnson, 2011). Additionally, staining of fins with general axonal markers indicates that axons innervate the adult fin (König et al., 2019; Lisse et al., 2016; Lee et al., 2013). However, the identity of these axons and the relationship between nerves and other anatomical structures in the caudal fin remain poorly described.

To determine the general organization of peripheral axons within the caudal fin, we stained fins with the monoclonal antibody zn-12 (Metcalf et al., 1990) and an anti-acetylated tubulin (acTub) antibody, both of which stain multiple types of peripheral axons, and performed high-resolution confocal imaging. In lateral views, we found that axon trajectories followed each of the 18 rays of the caudal fin (Fig. 1B). At ray bifurcations, axon bundles bifurcated to innervate both distal rays (Fig. 1B). Thus, peripheral axons adopt a highly stereotyped pattern mirroring the ray morphology within the adult caudal fin.

### Somatosensory nerves innervate the adult caudal fin rays

Muscles localize only to the base of the caudal fin and a previous analysis based on neuronal dye-filling concluded that motor neurons are largely absent from the caudal fin itself (Schneider and Sulner, 2006). Thus, the peripheral axons we observed likely originated from a different neuronal population. Based on their morphology, we postulated that they derived from dorsal root ganglion (DRG) somatosensory neurons.

We took two complementary approaches to establish the identity of axons within the caudal fin. First, we reasoned that mutants with reduced DRG neurogenesis would exhibit decreased fin innervation. To test this prediction, we examined animals homozygous for a predicted null allele of *erbb3b* (*erbb3b<sup>st48/st48</sup>*) (Lyons et al., 2005), in which neural crest migration is disrupted, thereby perturbing DRG neurogenesis (Honjo et al., 2008). *erbb3b* mutant caudal fins did not exhibit gross morphological alterations in ray patterning. Consistent with our prediction, staining of *erbb3b* mutant caudal fins for acTub revealed a strong decrease in the amount of bony ray innervation, compared with wild-type fins (Fig. 1C,D). Second, we examined the expression of a reporter for a subset of somatosensory neurons [*Tg(p2rx3a>mCherry)*; Palanca et al., 2013] in the caudal fin. We found that the pattern of somatosensory axons recapitulated the ray-associated staining we observed using general axonal markers (Fig. 1E; Movie 1). Imaging of this reporter revealed that axons branch within ray segments and exit between dorsal and ventral gaps in the hemirays to innervate the inter-ray space (Fig. 1F, arrowheads). Furthermore, we observed that the rays at the dorsal and ventral fin margins had a denser concentration of *p2rx3a<sup>+</sup>* axons than more medial rays (Fig. 1G).

How are somatosensory axons positioned relative to other cell types in the fin? We were particularly interested in the proximity and patterning of axons in relation to endothelium because of their close

association in other developmental and tissue contexts (reviewed by Segarra et al., 2019). Through co-imaging of somatosensory axon markers and *Tg(fli1a:EGFP)*, a pan-endothelial reporter (Lawson and Weinstein, 2002), we noted that endothelium and sensory axons both exit through dorsal and ventral gaps in the hemirays, but not generally at the same proximal-distal positions along the rays (Fig. 1H). To establish the lateral axial position of caudal fin axons, we cryosectioned fins and found that somatosensory axons did not obviously associate with endothelial cells located in the center of the intra-ray space (Fig. 1I). Rather, co-staining with the osteoblast marker *zn5-5* (Johnson and Weston, 1995) revealed axons adjacent to osteoblasts lining the inner hemiray surface (Fig. 1J; see also Movie 1). This localization of somatosensory axons along the concave surface of the inner hemirays is consistent with a previous study that identified neural crest-derived Schwann cells localized to a similar position in the bony rays (Lee et al., 2013). Thus, somatosensory nerves, composed of peripheral axons of DRG neurons and associated Schwann cells, traverse along caudal fin rays in close proximity to osteoblasts that line the inner hemiray surface (Fig. 1K).

### Innervation of the caudal fin rays coincides with endothelial remodeling

To determine how this stereotyped architecture develops, we analyzed the early stages of caudal fin morphogenesis. The caudal fin develops from the larval fin fold, a relatively thin, simple tissue lacking endothelium and bones. The major stages of caudal fin morphogenesis have been described by light microscopy (Bird and Mabee, 2003; Parichy et al., 2009). Briefly, beginning at approximately 4.2 mm standard length (SL), a mesenchymal condensation forms ventral to the notochord (Fig. 2A, top). Segments of the initial fin rays appear shortly thereafter within the condensation, with pairs of new rays sequentially added on the dorsal and ventral flanks of the initial rays (Fig. 2B–D, top). The first ray joints appear at approximately 6.0 mm SL, with new segments added distally. The fin adopts its characteristic bi-lobed structure beginning at around 6.5 mm SL (Fig. 2E, top). Caudal fin endothelial development involves ventral sprouting from posterior axial vessels and formation of a plexus intermediate, which progressively remodels into the mature, repeating pattern of endothelium aligned along and beside the rays (Huang et al., 2009).

To establish the detailed timing of these stages of endothelial development relative to ray formation, we imaged transgenic animals co-expressing *Tg(fli1a:EGFP)* and *Tg(sp7:mCherry-NTR)*, a reporter for osteoblasts at an intermediate state of differentiation (Knopf et al., 2011; Singh et al., 2012). Prior to the appearance of *sp7<sup>+</sup>* rays, and concomitant with the formation of the mesenchymal condensation, we observed an initial projection of endothelium into the ventral fin fold (Fig. 2A). This ventral sprout formed at the eventual position of the hypural diastema (HD) (Fig. 2D). The initial two rays formed flanking the dorsal and ventral margins of the endothelial projection, at a stage when the endothelium had begun to form a ventral, fan-shaped plexus (Fig. 2B). At this early stage, we observed blood flowing from the dorsal aorta through the HD and circulating within lumenized vessels in the fin plexus (Movie 2), indicating that the fin endothelium had begun to mature functionally. As rays were added sequentially along the dorsal and ventral margins, the plexus continued to expand and eventually connected to the posterior-most axial vessels via a dorsal loop around the 6-ray stage (Fig. 2C, arrowhead; Movie 3). Throughout this period, the hemirays flanked the lateral sides of the sheet-like plexus (Fig. 2A–C, slice views).



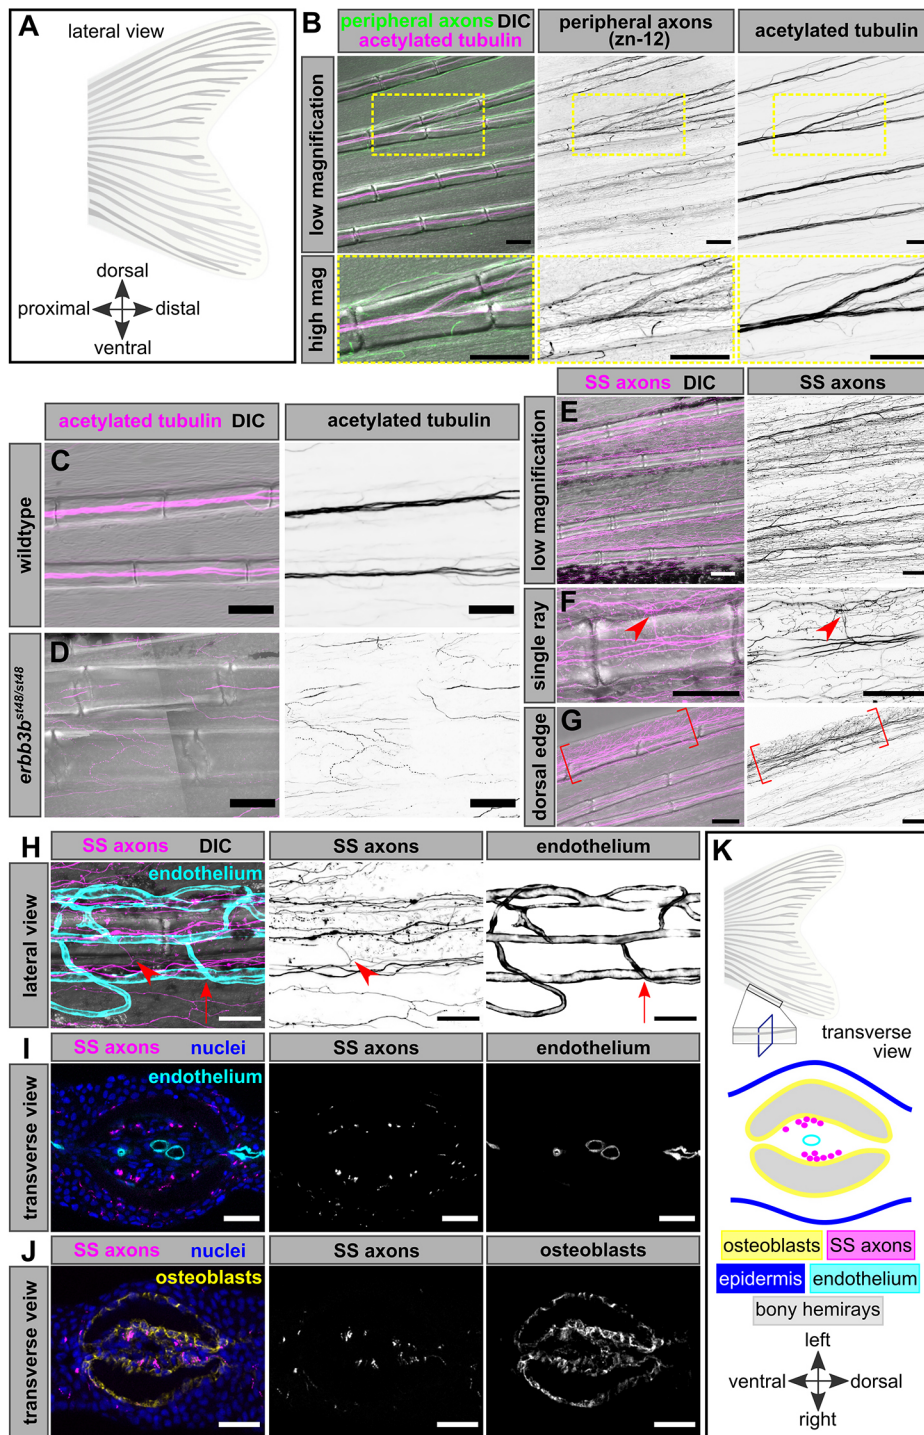

**Fig. 1. Somatosensory innervation of the adult caudal fin.** (A) Schematic of the adult zebrafish caudal fin anatomy, composed of 18 bony rays. Distal (posterior) is to the right in this and subsequent lateral views. (B) Lateral view of adult caudal fin, fixed and immunostained for peripheral axons (zn-12 antibody) and acetylated tubulin. Insets show high-magnification images of a ray bifurcation. Note that zn-12 preferentially stains axon endings, whereas acetylated tubulin preferentially labels axon bundles. (C,D) Representative images of caudal fin bony rays (DIC) and acetylated tubulin staining in adult fins of the indicated genotypes. (E-G) Caudal fin bony rays (DIC) and somatosensory axons (SS axons) of an adult *Tg(p2rx3a>mCherry)* fish. Arrowheads in F illustrate an axon branching to exit the ray segment. Note the increased density of somatosensory axons at the dorsal-most fin edge in G as indicated by the brackets. (H) Single caudal fin bony ray (DIC), somatosensory axons (SS axons) and endothelium of an adult *Tg(p2rx3a>mCherry); Tg(fli1a:EGFP)* fish. Arrowheads denote a SS axon entering or exiting the bony ray, not associated with endothelial exit points (arrows mark one such example). (I) Transverse cross-section of a single bony ray of an adult *Tg(p2rx3a>mCherry); Tg(fli1a:EGFP)* fish. Note the lack of apparent association between axons and endothelium within the intra-ray space. (J) Transverse cross-section of a single bony ray of an adult *Tg(p2rx3a>mCherry)* fish, immunostained with the *zns-5* antibody to label osteoblasts. Note the close juxtaposition of axons and intra-ray osteoblasts. (K) Schematic illustrating the anatomy of a transverse view of a single bony ray based on our results. Scale bars: 100 µm (B-G); 50 µm (H); 25 µm (I,J).

In contrast to a previous study that proposed that endothelium templates ray growth (Huang et al., 2009), we did not observe the appearance of linear, ray-aligned endothelium at these early stages of fin morphogenesis. Rather, refinement of the vessels to align with the rays occurred between the 14- and 18-ray stages (Fig. 2F-I). By ~6.5 mm, when the bi-lobed fin shape emerged, we observed both endothelium and melanophores tracking along the bony rays (Fig. 2E). Quantification of vessel density (percentage of vessels per unit area) and branching index (number of vessel junctions per unit area) revealed a negative, linear relationship between each metric and standard length (Fig. 2J-M), highlighting the plasticity of the endothelium during fin organogenesis.

How does the timing of ray innervation relate to the events of bone formation and fin endothelialization that we describe? In one possible model, DRG axons might first ‘pathfind’ through the developing fin fold tissue, restricting osteogenesis to specific domains, similar to the development of cranial foramina (Akbareian et al., 2015). In another model, osteoblasts might coalesce into hemirays first, through which axons could subsequently pathfind, similar to the radial osteoblast conduits that guide scale innervation (Rasmussen et al., 2018). To distinguish between these possibilities, we visualized axons during the early stages of caudal fin morphogenesis. Using acTub immunostaining to label all axons in the developing fin, we observed that ray innervation occurred



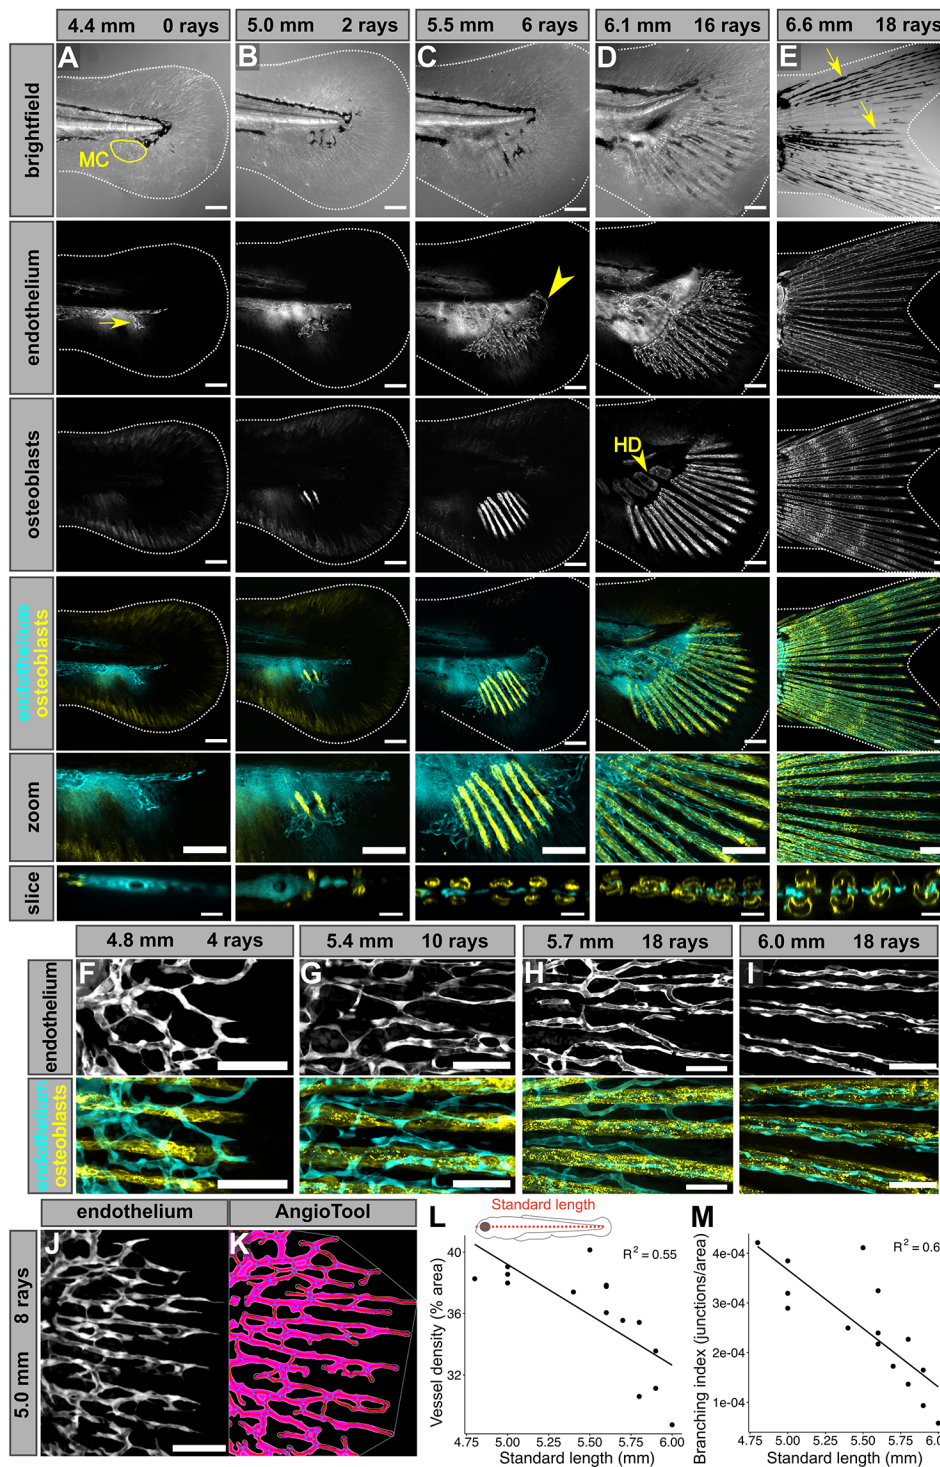

**Fig. 2. Stages of endothelial outgrowth, plexus formation, and remodeling during caudal fin development.** (A-E) Lateral views of confocal projections of caudal fins fixed at the indicated stages expressing transgenic markers for osteoblasts [*Tg(sp7:mCherry-NTR)*] and endothelium [*Tg(fli1a:EGFP)*]. Dotted lines denote caudal fin margins. 'Zoom' panels show cropped, enlarged regions of merged images. 'Slice' panels represent reconstructed orthogonal views of the developing plexus and ray-associated osteoblasts. The yellow arrow in A indicates the ventral endothelial sprout. The yellow outline in A indicates the mesenchymal condensation (MC), visible under brightfield. The yellow arrowhead in C indicates the dorsal endothelial loop. The yellow arrowhead in D indicates the hypural diastema (HD), the future location between hypurals 2 and 3. The yellow arrows in E point to examples of melanophores tracking along bony rays. (F-I) Confocal projections of osteoblasts [*Tg(sp7:mCherry-NTR)*] and endothelium [*Tg(fli1a:EGFP)*], capturing endothelial remodeling around the osteoblasts at the indicated stages. Note that the initially disorganized, web-like plexus progressively remodels to its mature linear, ray-aligned morphology. (J,K) Example of an endothelial [*Tg(fli1a:EGFP)*] image (J), segmented and analyzed in AngioTool (K). Blue dots denote branchpoints. (L,M) Quantification of density and branching of the caudal fin endothelium relative to standard length. Scale bars: 100  $\mu$ m (A-E); 20  $\mu$ m (A-E, slice panels); 50  $\mu$ m (F-J).

after endothelial sprouting and initial bony ray formation (Fig. 3A-E). Prior to the 8-ray stage, the axons in the fin fold tissue were all superficial, arborizing through the epidermis without clear directionality (Fig. 3A,B). Innervation of the rays rapidly increased beginning at approximately the 10-ray stage (Fig. 3C). At this stage, we observed bilateral, symmetrical innervation of the developing rays, with axons juxtaposed to *sp7*<sup>+</sup> osteoblasts found lining the inner hemiray surface (Fig. 3C, slice inset; Movie 4). These results suggest that the inner hemiray axon pattern seen in the

adult caudal fin is established during the earliest stages of ray innervation. By the 18-ray stage, the fin axons were arranged in a striking candelabra-like pattern (Fig. 3D,E). We measured the development timing of ray innervation against SL and notochord flexion angle, two indicators of maturation, and found that both accurately predicted innervation timing (Fig. 3F,G). In conclusion, the process of caudal fin ray innervation occurs via DRG axons migrating in close association with inner hemiray osteoblasts during a period of active endothelial remodeling.



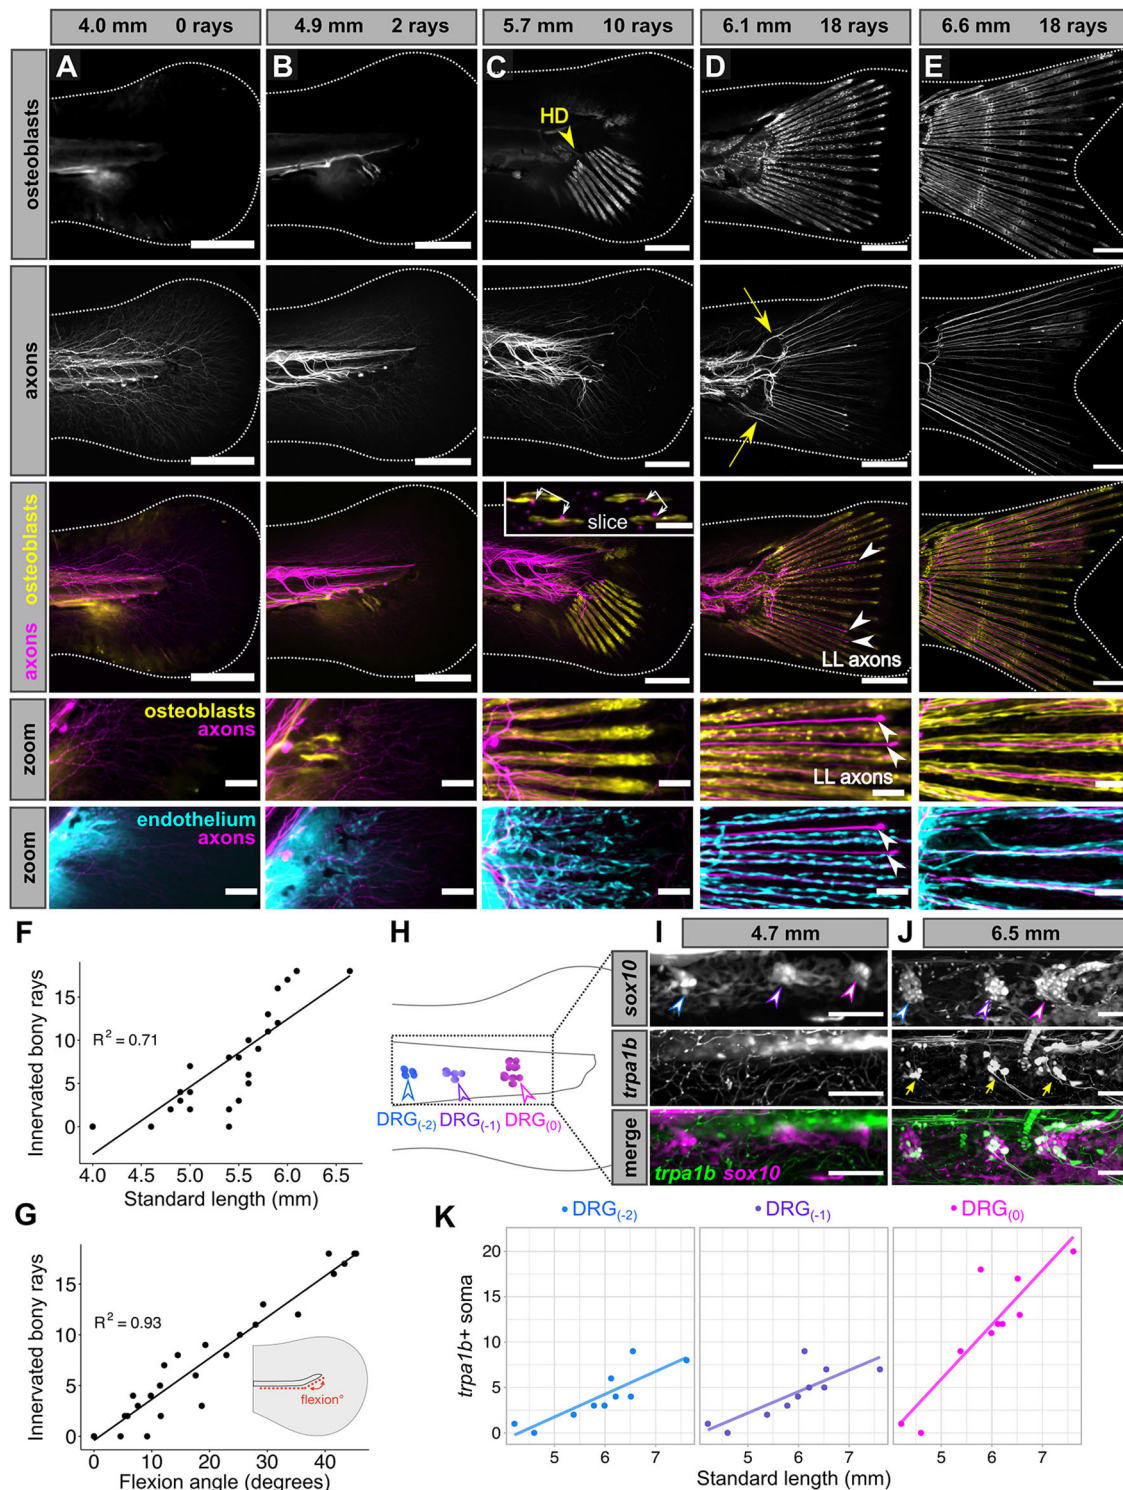

**Fig. 3. Timing of DRG ray innervation and maturation during caudal fin development.** (A-E) Confocal projections of caudal fins fixed at the indicated stages expressing transgenic markers for osteoblasts [*Tg(sp7:mCherry-NTR)*] and endothelium [*Tg(fli1a:EGFP)*] and immunostained for axons (acetylated tubulin antibody). 'Zoom' images are cropped, enlarged regions of merged images. Dotted lines denote caudal fin margins. The yellow arrowhead in C denotes the future position of the hypural diastema (HD). New rays are added symmetrically on either side of the HD. Double-headed arrows in the inset in C denote the bilateral, symmetrical pattern of innervation. Note the axons on the inner surface of each hemiray in the slice panel. The yellow arrows in D denote that the dorsal-most and ventral-most ray-associated axons originate along separate routes than the inner ray-associated axons. White arrowheads indicate the position of lateral line (LL) axons growing into the caudal fin in the inter-ray space. (F,G) Quantification of the number of innervated bony rays versus standard length (F) and notochord flexion angle (G). (H) Schematic illustrating the three posterior ganglia of the developing trunk, with DRG<sub>(0)</sub> (magenta) demarcating the most posterior cluster, DRG<sub>(-1)</sub> marking the second most posterior cluster (purple) and DRG<sub>(-2)</sub> marking the third most posterior cluster (blue). (I,J) Confocal projections of fish expressing neural crest lineage [*sox10: Tg(Mmu.Sox10-Mmu.Fos:Cre);Tg(actb2:LOXP-BFP-LOXP-DsRed)*] and sensory channel [*TgBAC(trpa1b:EGFP)*] reporters. Arrowheads indicate DRGs color-coded as in H. Arrows indicate *trpa1b*<sup>+</sup> DRG soma. (K) Scatterplots with linear regression lines showing quantification of *trpa1b*<sup>+</sup> soma (arrows in J) in each of the three posterior-most ganglia relative to standard length. Scale bars: 200  $\mu$ m (A-E); 10  $\mu$ m (inset in C); 50  $\mu$ m (A-E zoom panels; I,J).

### Ray innervation coincides with DRG functional maturation

The initial period of DRG neurogenesis occurs during the first few days of zebrafish development. However, at these early stages, DRG neurons have not been reported to express molecules involved in the detection of somatosensory stimuli, such as the transient receptor potential (TRP) channels *Trpa1b* or *Trpv1* (Esancy et al., 2018; Gau et al., 2013; Pan et al., 2012; Prober et al., 2008). How might the period of fin innervation we identified relate to the functional maturation of DRG neurons? To address this question, we examined the expression of a reporter for *trpa1b* [*TgBAC(trpa1b:EGFP)*; Pan et al., 2012], which encodes a TRP channel that detects noxious chemicals (Prober et al., 2008), in the three most posterior DRG in the trunk (Fig. 3H). By quantifying *trpa1b*<sup>+</sup> neuronal soma within these ganglia, we found that the onset of *trpa1b* expression tightly corresponded to the period of active fin innervation (Fig. 3I-K). Thus, DRG nerves not only pathfind through the bony rays at early stages of caudal fin organogenesis, but they also begin to express functional sensory molecules.

### Caudal fin endothelialization requires VEGFR signaling

To test for an interdependence between tissue types during caudal fin development, we first sought to identify the molecular signals required for fin endothelialization. Given its function regulating angiogenesis during caudal fin regeneration (Bayliss et al., 2006), we considered vascular endothelial growth factor receptor (VEGFR) a strong candidate. To block VEGFR signaling, we used PTK787, a highly specific pharmacological inhibitor of VEGFR (Bayliss et al., 2006). Compared with DMSO-treated controls, we found that application of 0.5  $\mu$ M PTK787 beginning at 4.2–4.4 mm SL completely blocked endothelial growth in the developing fin (Fig. 4A,B–G, top row). Despite PTK787 systemically inhibiting VEGFR, fish without caudal fin endothelium progressed through similar developmental metrics of maturation, including notochord flexion, standard length, and number of bony rays, compared with controls (Fig. 4H,I). However, we did note that PTK787-treated fins plateaued with an upper size limit of  $\sim 1$  mm<sup>2</sup> (Fig. 4J). Thus, VEGFR signaling is necessary for caudal fin endothelialization and the rapid expansion of fin size that occurs during organogenesis.

### Endothelium is not required for initial fin ray and nerve morphogenesis

We next sought to test the requirement of each respective tissue – endothelium, osteoblasts and DRG neurons – on each other's development during fin maturation. Previous work proposed that endothelium guides osteoblast patterning during caudal fin morphogenesis (Huang et al., 2009); however, this requirement was not formally tested. To assess directly the requirement of endothelium in tissue patterning during fin morphogenesis, we treated animals with PTK787 to inhibit endothelialization of the fin and examined osteoblast and axon organization (Fig. 4A). Remarkably, when we examined *sp7*<sup>+</sup> osteoblasts in PTK787-treated fins, we observed that the osteoblasts continued their symmetrical bony ray outgrowth, similar to controls (Fig. 4B–G). In the absence of an endothelial plexus, a full suite of 18 bony rays formed by 6 mm SL and appeared to initiate the process of segmentation, similar to controls (Fig. 4D,G; data not shown). Vessels influence the development and homeostasis of peripheral nerves in many contexts (reviewed by Segarra et al., 2019). To determine whether ray innervation requires endothelium, we stained PTK787- and DMSO-treated fish for acTub. We found that the pattern and timing of DRG axons innervating the bony rays were comparable between PTK787-treated fish and controls

(Fig. 4B–G,K). Thus, we conclude that endothelium is not required for osteoblast or axon patterning during the early stages of caudal fin organogenesis.

### Ray-associated osteoblasts and endothelium pattern independently of DRG neurons

Peripheral nerves provide cues that pattern vascular development in mouse limb skin (Li et al., 2013; Mukouyama et al., 2002, 2005). Although it is known that nerves are required for pectoral fin regeneration (Geraudie and Singer, 1985; Simões et al., 2014), their role in regulation of fin organogenesis has yet to be investigated. To assess the potential contributions of DRG nerves to fin development, we examined the integrity of caudal fin bony rays and endothelium in mutants in which DRG neurons do not properly develop (*erbb3b*<sup>st48/st48</sup> or *adgra2*<sup>984/984</sup> mutants; Honjo et al., 2008; Vanhollebeke et al., 2015). As predicted based on our observations in adults, *adgra2* and *erbb3b* mutant fins completely lacked ray-associated innervation (Fig. 5A–C) and had significantly reduced fin axon density compared with sibling controls (Fig. 5D). We imaged bony ray calcification with Alizarin Red Staining and did not visually identify any aberrations in early ray patterning relative to sibling controls (Fig. 5A–C). We next evaluated endothelial patterning in the caudal fins of these mutant fish and did not observe significant differences between siblings and mutants for either genotype, except for the number of endpoints between *erbb3b* mutants and siblings (Fig. 5E,F). Our observations indicate that DRG neurons are largely dispensable for endothelial and osteoblast patterning during the early stages of fin organogenesis.

### *sp7*<sup>+</sup> osteoblasts are required for endothelial remodeling and axon outgrowth

Informed by our previous findings that demonstrated a role for osteoblasts in guiding nerves and endothelium in developing scales (Rasmussen et al., 2018), we next investigated whether the bony rays themselves establish the pattern of caudal fin endothelium and innervation. To determine whether endothelial or axon development require osteoblasts, we took advantage of a previously described transgenic strategy to ablate *sp7*<sup>+</sup> osteoblasts in an inducible manner during the early stages of caudal fin morphogenesis. The transgenic line *Tg(sp7:mCherry-NTR)* expresses the nitroreductase enzyme (NTR) fused to mCherry, which allows for conditional ablation of *sp7*<sup>+</sup> osteoblasts upon addition of metronidazole (MTZ) (Singh et al., 2012).

To ablate *sp7*<sup>+</sup> osteoblasts in the developing caudal fin, we applied 9 mM MTZ to double-transgenic *Tg(sp7:mCherry-NTR); Tg(fli1a:EGFP)* fish beginning at 4.2–4.4 mm SL, or  $\sim 7$  days post-fertilization (dpf) (Fig. 6A). After an initial 24 h exposure, we then maintained fish in 4.5 mM MTZ for the remainder of the experimental trial to avoid MTZ-mediated toxicity. As controls, we exposed single transgenic *Tg(fli1a:EGFP)* siblings to the same MTZ treatment. To confirm that we had ablated osteoblasts, we stained treated fins with zns-5 and Alizarin Red S. We observed complete elimination of zns-5<sup>+</sup> osteoblasts and calcified bone compared with controls (Fig. 6B,C). To account for any effects of our ablation strategy on animal or organ growth, we compared developmental metrics between treatment groups. We found that although the overall fin area of *sp7*<sup>+</sup>-ablated fish was significantly decreased compared with control fish, metrics of maturation (flexion angle, SL) were not significantly different between the two groups (Fig. 6D,E). Thus, our ablation regimen efficiently ablated *sp7*<sup>+</sup> osteoblasts, with minimal effects on overall larval development.



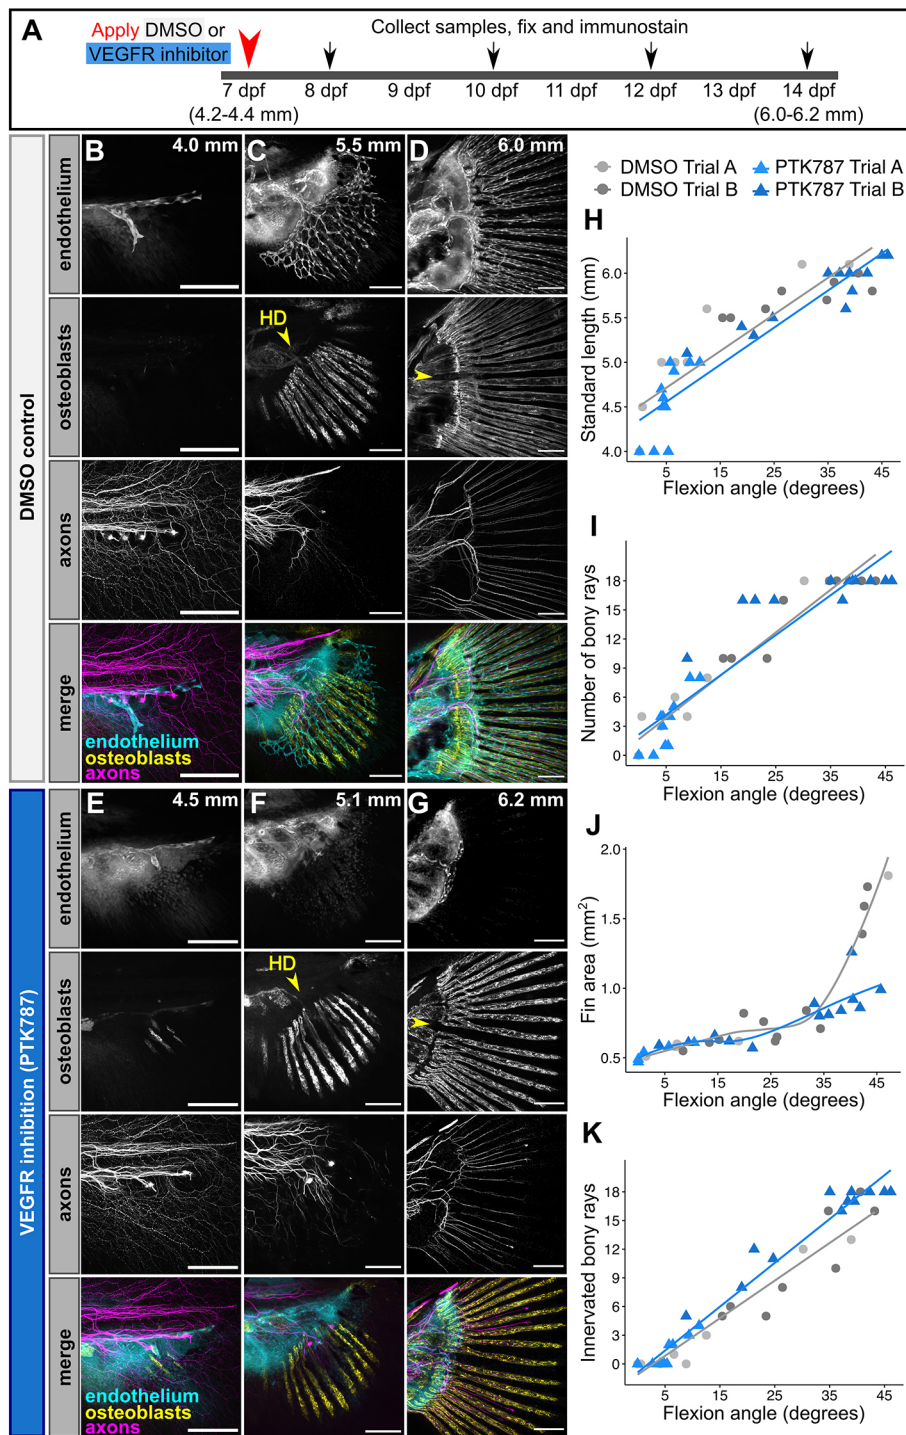

**Fig. 4. Caudal fin bony ray development and innervation progress in the absence of endothelium.** (A) Diagram illustrating experimental scheme of VEGFR inhibition in developing zebrafish. (B-G) Confocal projections of fins expressing reporters for osteoblasts [*Tg(sp7:mCherry-NTR)*] and endothelium [*Tg(fli1a:EGFP)*] and immunostained for axons (acetylated tubulin antibody). Treatments and stages as indicated. Yellow arrowhead denotes the future position of the hypural diastema (HD). Note that despite the severe reduction in endothelial growth into the fin following PTK787 treatment, early osteoblast and axon patterning appear unperturbed. (H-K) Quantification of developmental metrics and ray innervation between treatment groups. Lines represent linear regression (H,I,K) or local polynomial smoothing (J). SL/flexion angle slope between the two independent trials of DMSO control fish and PTK-treated fish was not significantly different ( $P=0.158$ ; ANCOVA). Number of bony rays/flexion angle slope between the two independent trials of DMSO control fish and PTK treated fish was not significantly different ( $P=0.913$ ; ANCOVA). Number of innervated rays/flexion angle slope between the two independent trials of DMSO control fish and PTK treated fish was significantly different above a flexion angle of 13.06 degrees ( $P<0.05$ ; Johnson–Neyman technique). For H,I,K, a total of  $n=24$  PTK787-treated (mean  $SL=5.14\pm0.74$  s.d.) and  $n=18$  DMSO-treated fish (mean  $SL=5.28\pm0.73$  s.d.) are plotted. For J, a total of  $n=18$  PTK787-treated (mean  $SL=5.49\pm0.58$  s.d.) and  $n=17$  DMSO-treated fish (mean  $SL=5.72\pm0.61$  s.d.) are plotted. Data are representative of at least three biological replicates. Scale bars: 100  $\mu$ m (B-G).

We evaluated endothelial and nerve patterning in MTZ-treated fins and found that *fli1a*<sup>+</sup> vessels grew into developing fins in the absence of *sp7*<sup>+</sup> osteoblasts (Fig. 6F-H). Quantitative analysis of vessel patterning revealed that vessel density was not significantly different in the *sp7*<sup>+</sup>-ablated fins compared with controls (Fig. 6I). However, treated fins did exhibit a significant increase in the number of vessel endpoints (fragmentation) and vessel branching compared with controls (Fig. 6J,K). Additionally, we observed that in the absence of *sp7*<sup>+</sup> osteoblasts, DRG axon pathfinding was stunted and disorganized and innervation density was significantly decreased (Fig. 6G,H,L). Together, these results suggest that

although *sp7*<sup>+</sup> osteoblasts are not required for the initial events of caudal fin organogenesis, including ventral endothelial sprouting and plexus formation, they are required for the later stages of endothelial remodeling, axon innervation and organ growth.

## DISCUSSION

Congruent neurovascular-bone patterning has been documented in diverse tissues for over 150 years, yet how this congruence is generally achieved remains an unanswered question in vertebrate development. In this study, we pioneer the use of the zebrafish caudal fin – an optically clear and relatively two-dimensional

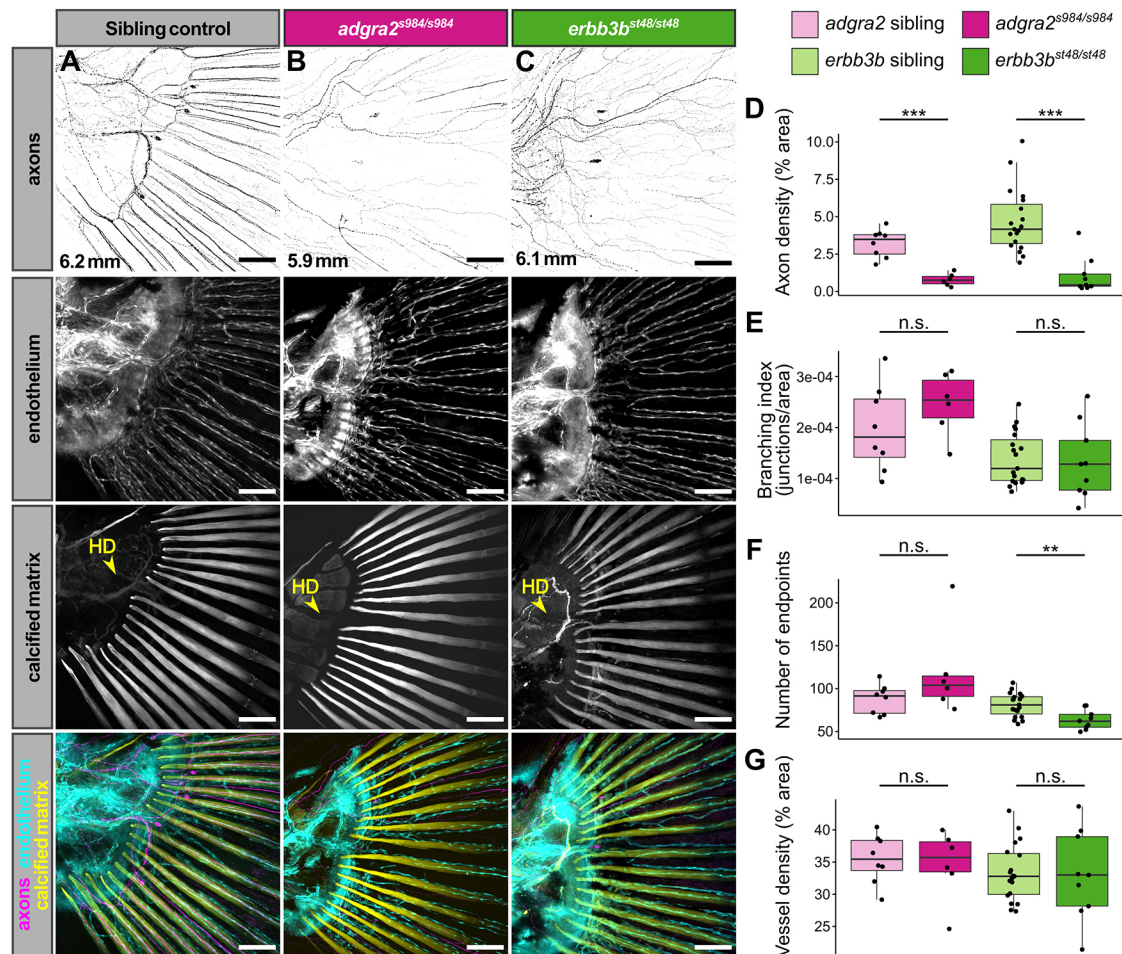

**Fig. 5. Innervation of the caudal fin bony rays by DRG axons is not required for caudal fin ray and endothelial patterning.** (A–C) Representative confocal projections of caudal fins from the indicated genotypes expressing the endothelial marker *Tg(fli1a:EGFP)* fixed at the indicated stages and stained for axons (acetylated tubulin antibody) and calcified matrix (Alizarin Red S). Note the lack of ray-associated axons in the *adgra2* and *erbb3b* mutants. Yellow arrowheads indicate the hypural diastema (HD). (D–G) Box plots of axon density, branching index, number of endpoints, and vessel density for fins of the indicated genotypes. Wilcoxon rank sum test between *adgra2* siblings and *adgra2* mutants (axon density,  $P=0.000666$ ; branching index,  $P=0.345$ ; number of endpoints,  $P=0.1551$ ; vessel density,  $P=0.8518$ ). *adgra2* sibling fish,  $n=8$  (mean SL=6.01 mm±0.11 s.d.). *adgra2* mutant fish,  $n=6$  (mean SL=6.0 mm±0.48 s.d.). Wilcoxon rank sum test between *erbb3b* siblings and *erbb3b* mutants (axon density,  $P=2.809e-05$ ; branching index,  $P=0.6993$ ; number of endpoints,  $P=0.004654$ ; vessel density,  $P=0.9615$ ). *erbb3b* sibling fish,  $n=19$  (mean SL=6.34 mm±0.29 s.d.). *erbb3b* mutant fish,  $n=9$  (mean SL=6.89 mm±0.45 s.d.). \*\* $P<0.01$ , \*\*\* $P<0.001$ . n.s., non-significant. Data are representative of at least two biological replicates. Scale bars: 100 μm (A–C).

organ – for developmental analysis of neurovascular-bone interactions. Despite being extensively used as a model for organ regeneration (reviewed by Pfefferli and Jaźwińska, 2015; Poss et al., 2003), the identity of peripheral nerves within the caudal fin, their relationships to other tissue types, and the mechanisms of their innervation have not been analyzed in depth. Here, we address these knowledge gaps directly and establish a cellular hierarchy during fin development. Based on our results from systematically blocking the development of bones, vessels and sensory neurons, we propose that osteoblasts function as central organizers that pattern the two other cell types during fin organogenesis.

The tight association between nerves and ray-associated osteoblasts that we report here in the zebrafish caudal fin extends previous findings in several teleosts. Histological studies from the 1980s reported the ‘collagen fibrils’ of nerve fibers within the caudal fin bony rays of tilapia (Becerra et al., 1983; Montes et al., 1982). Recent work in medaka, another teleost, identified nerves running through the bony rays and colocalizing with myelinating cells (Dodo- et al., 2020). Furthermore, axon-associated neural

crest-derived Schwann cells localize to the inner hemiray surface in zebrafish (Lee et al., 2013). Using somatosensory-specific reporters and mutant analysis, we show that the axon bundles at the inner, concave osteoblast-lined surface are the peripheral axons of DRG neurons. We hypothesize that these sensory axons utilize the bony ray tracts before innervating surrounding fin tissue as protective ‘armor’ to avoid injury and debilitating damage. We further find that different fin regions have variable densities of somatosensory innervation, akin to anatomical differences observed in humans (Johansson and Vallbo, 1979). Together, our work and that of others demonstrate that somatosensory axons traverse the relatively long distance of the adult caudal fin by running through the dermal bony rays, tightly juxtaposed to intra-ray osteoblasts (Fig. 1K), and not the intra-ray arteries, as previously suggested (Tu and Johnson, 2011).

Our developmental analysis showed that caudal fin morphogenesis – specifically, the development of its bone, nerves, and endothelium – is a rapid process of sequential outgrowth, proliferation, interaction and remodeling. An initial



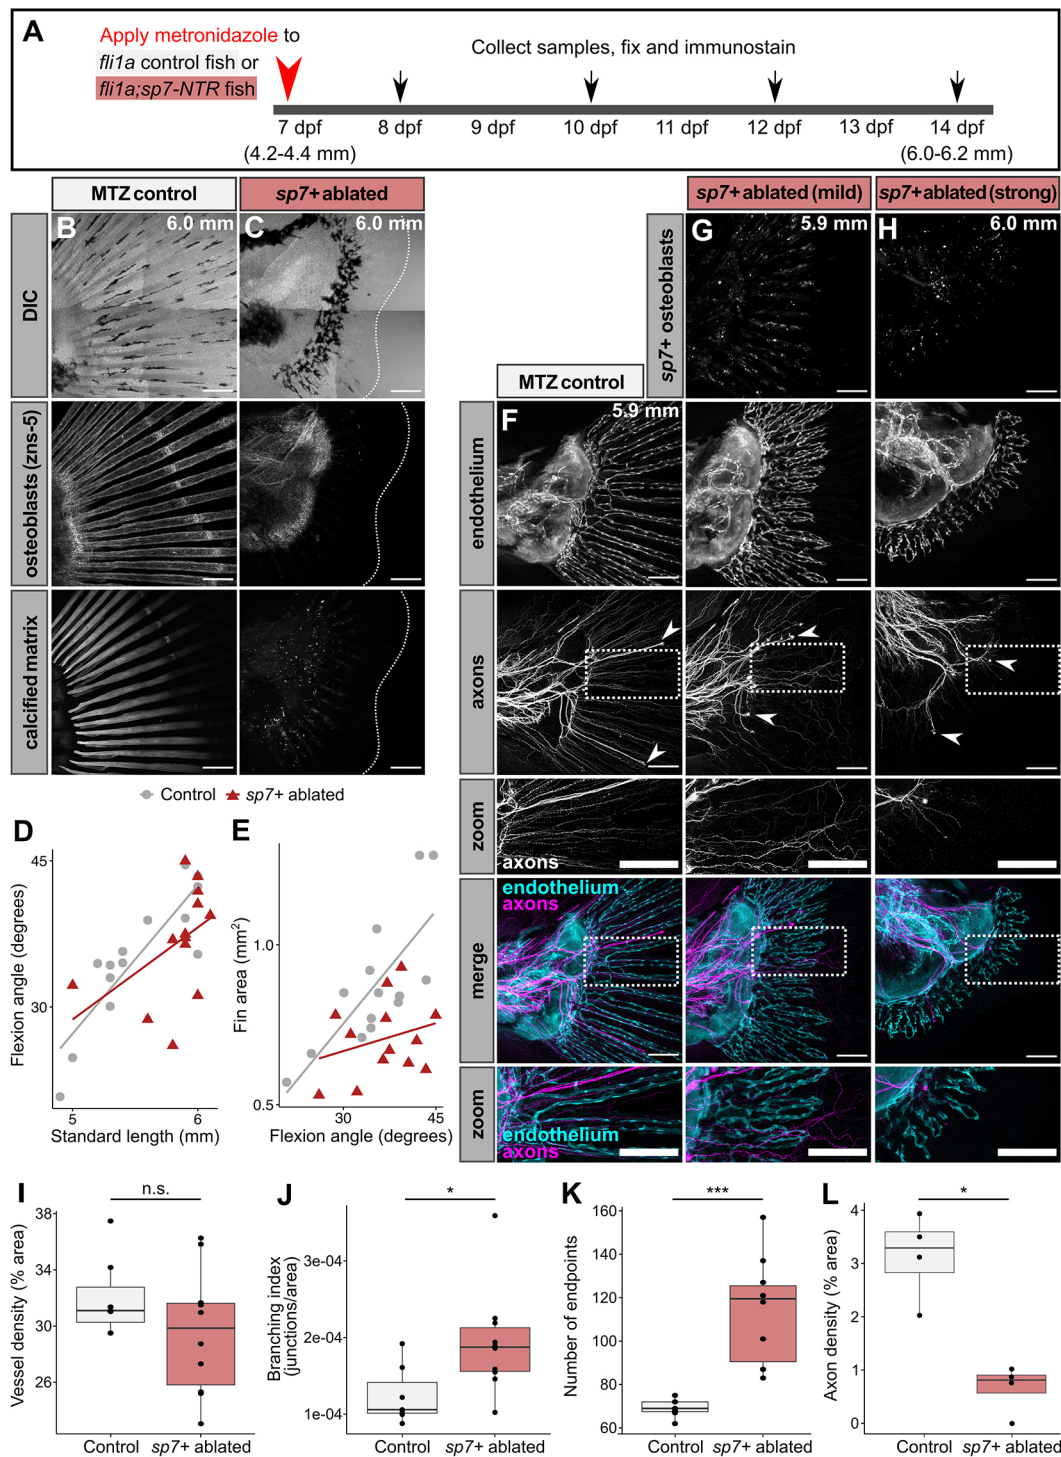

**Fig. 6. Osteoblasts are required for endothelial remodeling and axon patterning in the developing caudal fin.** (A) Diagram illustrating experimental scheme of *sp7<sup>+</sup>* osteoblast ablation in developing zebrafish. (B,C) Representative confocal projections of MTZ-treated control [*Tg(fli1a:EGFP)*] or osteoblast-ablated [*Tg(fli1a:EGFP);Tg(sp7:mCherry-NTR)*] caudal fins fixed at the indicated stages and stained for markers of osteoblasts (zns-5 antibody) and calcified matrix Alizarin Red S. Dotted lines denote caudal fin margins. Note the lack of zns-5<sup>+</sup> osteoblasts and calcified matrix within the osteoblast ablated fin. (D,E) Developmental metrics in control and *sp7<sup>+</sup>*-ablated fins. Control *fli1a<sup>+</sup>* fish, *n*=14. *sp7<sup>+</sup>* ablated fish, *n*=13. SL/flexion slope between genotypes was not significantly different (*P*=0.154; ANCOVA). Flexion/fin area between genotypes was significantly different (*P*=0.00102; ANCOVA). Representative results from a single independent trial. (F-H) Representative confocal projections of MTZ-treated control [*Tg(fli1a:EGFP)*] or osteoblast-ablated [*Tg(fli1a:EGFP);Tg(sp7:mCherry-NTR)*] caudal fins fixed at the indicated stages and stained for axons (acetylated tubulin antibody). White arrowheads indicate lateral line (LL) axons. Note the disorganized appearance of axons and endothelium in the absence of *sp7<sup>+</sup>* osteoblasts. 'Zoom' panels show high-magnification images of the boxed areas above. (I-K) Box plots of vessel density, branching index and number of endpoints between treatment groups. Wilcoxon rank sum test results: vessel density, *P*=0.31; branching index, *P*=0.033; number of endpoints, *P*=0.00074. Control *fli1a<sup>+</sup>* fish, *n*=7 (mean SL=5.96 mm±0.05 s.d.). *sp7<sup>+</sup>* ablated fish, *n*=10 (mean SL=5.87 mm±0.15 s.d.). Representative results from a single independent trial. (L) Box plot of axon density between control and osteoblast-ablated groups. Wilcoxon rank sum test between groups, *P*=0.02857. Control *fli1a<sup>+</sup>* fish, *n*=4 (mean SL=5.9 mm±0.00 s.d.). *sp7<sup>+</sup>* ablated fish, *n*=4 (mean SL=5.93 mm±0.09 s.d.). \**P*<0.05, \*\*\**P*<0.001. n.s., non-significant. Data are representative of at least two biological replicates. Scale bars: 100 μm (B,C,F-H).

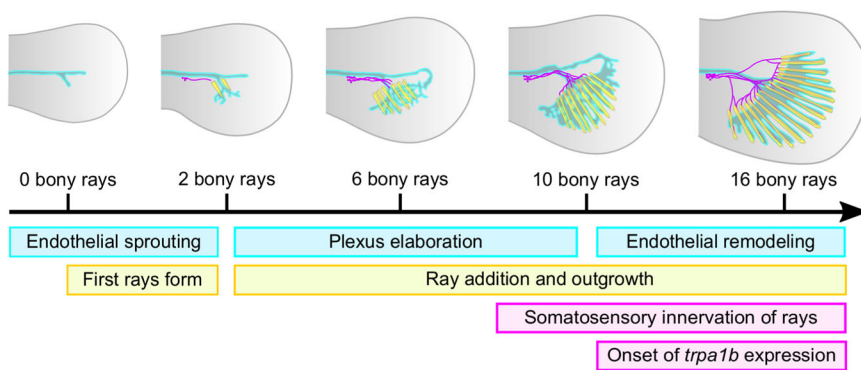

**Fig. 7. Summary of caudal fin ray, endothelium and axon development.** Schematic illustrating the sequential cellular events between caudal fin rays (yellow), endothelium (cyan) and somatosensory peripheral axons (magenta) during caudal fin development described in this study.

endothelial projection invades the ventral side of the fin fold, followed rapidly by the formation of the first paired bony rays (Fig. 7). As bony rays are added sequentially and symmetrically around the eventual hypural diastema, the endothelial plexus continues its outgrowth as a dense, web-like network (Fig. 7). Beginning around the 8–10 bony ray stage, axons pathfind through the inner surface of the paired hemirays (Fig. 7). The fin then undergoes rapid proliferation and extension of all three tissue types; osteoblasts deposit a full suite of 18 bony rays, endothelium remodels around the bony ray tracts, and axon bundles race down the inner hemiray surfaces towards the distal end of the fin. The ability to visually record these processes highlights the strength of the zebrafish caudal fin as a powerful *in vivo* model in which to explore the cellular basis of the neurovascular-bone relationship.

Previous studies suggest that the axons we observed arborizing within the early fin fold (e.g. Fig. 3A) are likely Rohon–Beard (RB) neurons (Rieger and Sagasti, 2011), a transient population of somatosensory neurons in anamniotes. As the fish mature from larval to juvenile stages, there is a transition in trunk and fin innervation from RB to DRG neurons (Rasmussen et al., 2018; Williams and Ribera, 2020). In contrast to the freely branching RB axons, we observed that DRG axons innervating the fin adopted a stereotyped, candelabra-like morphology beginning around the 8–10 ray stage. Although an initial population of DRG neurons develops by 3 dpf and expresses molecules involved in somatosensory neuron specification, such as *neurogenin 1* (Andermann et al., 2002; Cornell and Eisen, 2002), at these early stages DRG neurons are not reported to express the nociceptive markers *trpa1b* or *trpv1* (Esancy et al., 2018; Gau et al., 2013; Pan et al., 2012; Prober et al., 2008). We describe the concurrent timing of bony ray innervation and expression of *trpa1b* in a subset of DRG neurons. Whether these *trpa1b*<sup>+</sup> neurons reflect maturation of pre-existing neurons or addition of newly born neurons, which has been previously documented during these stages (McGraw et al., 2012), remains unknown. Our analysis of mutants lacking DRG neurons demonstrated that neither endothelial nor ray patterning requires somatosensory nerves. These results contrast with chick and mouse limb skin, where innervation induces local vascular remodeling (Li et al., 2013; Martin and Lewis, 1989; Mukouyama et al., 2002, 2005).

Huang et al. (2009) proposed that the caudal fin endothelium guides osteoblasts, thereby templating the subsequent bony rays they form. Moreover, a three-dimensional superstructural analysis demonstrated continuous intercellular communication pathways between vasculature and developing caudal fin rays (Akiva et al., 2019). Although we observed active blood flow in the fin at the stages of ray development and ray innervation (Movies 2 and 3), blocking endothelialization with the VEGFR inhibitor PTK787 did not inhibit either of these processes. Thus, although active blood

flow through the endothelial plexus is an early feature of caudal fin development, endothelial tissue is not required for the initial morphogenesis of caudal fin bony rays or their innervation by somatosensory axons. Nevertheless, we did find that PTK787-treated fins had a smaller overall size, suggesting that, similar to observations during fin regeneration (Bayliss et al., 2006), the avascular organ is limited in developmental growth potential. Further experiments are required to determine whether the limitation in organ growth in the absence of endothelium reflects hypoxic conditions or a necessity for endothelial signaling.

In our study, we examined the requirement of *sp7*<sup>+</sup> osteoblasts in patterning caudal fin endothelium and axons. It is important to note that our ablation strategy did not target *runx2*<sup>+</sup> pre-osteoblasts or collagen-rich actinotrichia, which localize to the leading edge of bony rays (Brown et al., 2009; Durán et al., 2011). Thus, with ray tips presumably intact, we perturbed only the intermediate osteoblast population (Fig. 6) and observed disrupted endothelium and axon patterning, but not complete disorganization. This finding suggests that *sp7*<sup>+</sup> osteoblasts are crucial for the process of endothelial plexus remodeling, but not initial outgrowth. Our results are consistent with recent work in the pectoral fin that observed a tight temporal relationship between endothelial remodeling and bony ray formation and suggested that bone cells likely produce proangiogenic cues (Paulissen et al., 2021 preprint). Collagen fibers promote endothelial growth during larval trunk vascular development and following adult fin amputation (Senk and Djonov, 2021). Whether the effect we observed of *sp7*<sup>+</sup> ablation on vessel remodeling in the fin is mediated by collagens or other factor(s) remains to be determined. In addition, as we observed wandering and stunted axon patterning following osteoblast ablation, our results suggest that *sp7*<sup>+</sup> osteoblasts may also be required to produce essential neurotrophic signals to attract sensory axon growth cones. One limitation to our approach is that MTZ-based ablation may have cytotoxic or systemic effects. However, our observation that overall vessel density was not significantly different following osteoblast ablation (Fig. 6I) argues against non-specific effects. Future improvement in ablation techniques and specificity, as well as additional molecular analyses, will build on our findings.

Nerve-dependent regeneration has been observed in response to appendage amputation in diverse animal phyla, from axolotl limbs (Kragl et al., 2009), to spiny mouse skin (Seifert et al., 2012), to zebrafish pectoral fins (Simões et al., 2014). Although the zebrafish caudal fin is a well-established model of appendage regeneration (reviewed by Pfefferli and Jazwińska, 2015; Poss et al., 2003), the role that sensory nerves play in its repatterning is not yet clear. Intriguingly, inhibition of cholinergic signaling in the caudal fin inhibits regeneration (Recidoro et al., 2014), suggesting that neuronal-derived cues are likely required. Dissecting the cellular



and molecular mechanisms of bone-associated innervation during early caudal fin development may shed light on the processes that enable organ re-innervation after severe injury.

## MATERIALS AND METHODS

### Zebrafish

Zebrafish (*Danio rerio*) were maintained at 26–27°C on a standard 14 h light/10 h dark cycle. Fish were staged by standard length (SL) (Parichy et al., 2009). Larval fish were raised in 0.8 l tanks at a maximum density of 50 fish per tank. Larvae were fed rotifers once or twice a day at a rate of 25,000–50,000 per tank until 10 dpf, after which they were fed artemia in addition to rotifers. SL of adult fish under anesthesia was measured with a standard ruler before performing caudal fin biopsies. Animals >18 mm SL were used for adult portions of the study (Fig. 1). Adults of either gender were used. SL of larval fish was measured using the IC Measure software (The Imaging Source) on images captured on a Stemi 508 stereoscope (Zeiss) equipped with a DFK 33UX264 digital camera (The Imaging Source). For larval studies, notochord flexion angle was also recorded as a marker of developmental progression (Parichy et al., 2009). The larval time points examined in this study were prior to the onset of mature gonad differentiation (Uchida et al., 2002); therefore, gender was not recorded at these stages. All animal husbandry and experimental procedures were approved by the University of Washington Office of Animal Welfare (protocol #4439-01).

The following stocks were used: AB (wild type), *Tg(Ola.Sp7:mCherry-Eco.NfsB)<sup>pd46Tg</sup>* [referred to as *Tg(sp7:mCherry-NTR)*; Singh et al., 2012], *Tg(sp7:EGFP)<sup>b1212Tg</sup>* (DeLaurier et al., 2010), *Tg(fli1a:EGFP)<sup>v1Tg</sup>* (Lawson and Weinstein, 2002), *Tg(Tru.P2rx3a:LEXA-VP16,4xLEXOP-mCherry)<sup>la207Tg</sup>* [referred to as *Tg(p2rx3a>mCherry)*; Palanca et al., 2013], *TgBAC(trpa1b:EGFP)<sup>a129Tg</sup>* (Pan et al., 2012), *Tg(Mmu.Sox10-Mmu.Fos:Cre)<sup>z384Tg</sup>* (Kague et al., 2012), *Tg(actb2:LOXP-BFP-LOXP-DsRed)<sup>sd27Tg</sup>* (Kobayashi et al., 2014), *Tg(-17.0neurog1:EGFP)<sup>w61Tg</sup>* (McGraw et al., 2008), *erbb3b<sup>sl48</sup>* (Lyons et al., 2005) and *adgra2<sup>s984</sup>* (Vanhollebeke et al., 2015).

### Whole-mount fixation

Samples were fixed in 4% paraformaldehyde in PBS overnight at 4°C. After fixation, samples were washed and permeabilized following an established protocol (Huang et al., 2009). Briefly, samples were washed twice, 5 min each, in PBS, then once for 5 min in H<sub>2</sub>O. They were permeabilized with acetone for 7 min at –20°C, followed by a 5 min wash in H<sub>2</sub>O and a 5 min wash in PBS.

### Whole-mount staining

Samples were blocked in 5% goat serum in PBST (PBS+0.3% Triton X-100) for at least 1 h at room temperature prior to antibody staining (König et al., 2019), then incubated in primary antibody diluted in PBST overnight at 4°C. The following day, following four 15 min washes in PBST, samples were incubated with the appropriate secondary antibody diluted in PBST overnight at 4°C. Samples were washed four times, 15 min each, in PBST, before incubation in DAPI (5 ng/μl). In some instances, to visualize mineralized bone, samples were stained for 15 min in a solution of 0.01% (wt/vol) Alizarin Red S (ACROS Organics; 400480250) dissolved in PBS, and subsequently rinsed three times for 5 min each in PBS. Samples were mounted on a glass slide in ProLong Gold antifade (Thermo Fisher) and a coverslip was applied. The following antibodies were used: rabbit monoclonal anti-acetylated alpha tubulin (Cell Signaling Technology; RRID:AB\_10544694; LOT:5; 1:800), mouse monoclonal zns-5 (Zebrafish International Resource Center; RRID:AB\_10013796; LOT:090511; 1:200), mouse monoclonal zn-12 (Zebrafish International Resource Center; RRID:AB\_10013761; LOT:090811; 1:200), goat anti-rabbit IgG (H+L) cross-adsorbed secondary antibody, Alexa Fluor 647 (Thermo Fisher; RRID:AB\_2633282; LOT:TH266005; 1:500) and goat anti-mouse IgG (H+L) cross-adsorbed secondary antibody, Alexa Fluor 488 (Thermo Fisher; RRID:AB\_2534069; LOT:TJ269846; 1:500).

### Cryosectioning

Caudal fin biopsies were fixed in 4% formaldehyde in PBS at room temperature for 1 h. Fins were then subjected to a sucrose sink and embedding steps, following an established protocol (Petrie et al., 2014). Briefly, tissue was washed in 5% sucrose in PBS for 30 min at room temperature. Then, fins were washed twice, 1 h each, in 5% sucrose in PBS. The solution was changed to 30% sucrose in PBS and samples were placed at 4°C on a nutator overnight. Finally, sucrose solution was adjusted to a 1:1 ratio of 30% sucrose:100% O.C.T. compound (Tissue-Tek, VWR 25608-930) and placed at 4°C on a nutator overnight. Tissue was then directly embedded in 100% O.C.T. in embedding wells and stored at –80°C.

Sectioning was performed on a Leica CM1850 cryostat. Fins were sectioned in the transverse orientation at 18 μm thickness. Sectioned samples were adhered to positively charged slides and stored at –80°C until processing. Retrieved slides were placed on a heat block at 37°C for 30 min to evaporate moisture. A hydrophobic pen (Cole-Parmer Hydrophobic Barrier PAP Pen UX-75955-53) was used to carefully trace an outline of samples and left to dry for 10–15 min. All staining, blocking and washing was performed as described above, but in a moisture chamber. After the final wash, a small drop of antifade and a coverslip were applied.

### Live imaging of larval fish

Fish were anesthetized in 100 μg/ml tricaine (MS-222) in system water until no longer motile. Animals were mounted in a glass-bottom dish in 0.6% low melt agarose dissolved in system water. Insect pins were used to gently manipulate the fish into place. Once the agarose had set, tricaine solution was added to the dish for imaging. After imaging was complete, fish were removed from the agarose and monitored in fresh system water until swimming again.

### Live imaging of blood flow

To visualize blood flow in the developing caudal fin, larval fish were anesthetized and mounted as described above. Differential interference contrast (DIC) images were captured on a A1R-MP+ confocal microscope (Nikon), using continuous image acquisition at a rate of 15 frames per second.

### Vascular growth inhibition

The VEGFR inhibitor PTK787 (Tocris Bioscience; 5680) was used to inhibit angiogenesis as previously described (Chan et al., 2002). PTK787 was dissolved in DMSO to a stock concentration of 50 mM. Treatments were performed on cohorts of 25 *Tg(fli1a:EGFP);Tg(sp7:mCherry-NTR)* fish per condition. Fish were treated with either 0.5 μM PTK787 or 0.00001% DMSO in system water. Fish were housed in 400 ml of static system water for the duration of the study. Regular feeding of rotifers and artemia was performed, and 80% of the water was exchanged every 2 days with fresh DMSO or PTK787 solution. Treatment began before the visible appearance of *sp7<sup>+</sup>* osteoblasts in the caudal fin (approximately 4.2–4.4 mm SL, or ~7 dpf). Fish were maintained in the drug for a maximum of 7 days before being sacrificed for analysis. Standard length, flexion angle and overall fin area were measured to evaluate potential developmental delay between treatment groups.

### Osteoblast ablation

Ablation of osteoblasts was performed with a chemically inducible, genetic approach. *Tg(sp7:mCherry-NTR)* fish (Singh et al., 2012) express NTR under the intermediate osteoblast promoter, *sp7* (previously known as *osterix/osx*). NTR renders the prodrug metronidazole (MTZ) cytotoxic, killing all *sp7<sup>+</sup>* osteoblasts after drug application. For this study, an initial dose of 9 mM MTZ (Sigma-Aldrich; M1547) was applied at approximately 4.2–4.4 mm SL, or ~7 dpf. After 24 h, fish were maintained at a 50% dose (4.5 mM) for the remainder of the experimental trial. Water and MTZ were exchanged every 48 h. This drug regimen did not result in significant morbidity. Sibling fish lacking *Tg(sp7:mCherry-NTR)* were subjected to the same drug treatment. Standard length, flexion angle and overall fin area were measured using IC Measure software and recorded to evaluate potential

developmental delay between experimental groups. Alizarin Red Staining (marking calcified matrix) and zns-5 antibody staining (alternative marker of osteoblasts) were used to confirm complete ablation of osteoblasts.

### DRG mutant identification

*erbb3b<sup>st48/+</sup>* and *adgra2<sup>984/+</sup>* adults were identified as described (Lyons et al., 2005; Vanhollebeke et al., 2015). Heterozygous adults were incrossed and homozygous mutant progeny were identified based on a reduction in larval DRG neurons (Honjo et al., 2008; Vanhollebeke et al., 2015) using *Tg(-17.0neurog1:EGFP)* as a marker (McGraw et al., 2008).

### Confocal imaging

Confocal z-stacks were acquired on a A1R-MP+ microscope (Nikon) equipped with 10× (air; NA 0.3), 16× (water immersion; NA 0.8) and 40× (oil; NA 1.3) objectives. Images captured in resonant scanning mode were post-processed using the denoise.ai function in NIS-Elements (Nikon). A TCS SP5 II (Leica) confocal microscope was used to capture the images in Fig. 1F,G,I,J.

### Image processing and analysis

Images in Figs 1–6 are maximum intensity z-stack projections prepared in Fiji (<http://fiji.sc>). Movies 1 and 4 were prepared using Imaris (Bitplane) and Shotcut (<https://shotcut.org/>).

### Quantitative vessel analysis

z-projections of *Tg(fli1a:EGFP)* confocal images were cropped perpendicular to the hypural diastema before being binarized with the Vessel Analysis plugin for Fiji. An individual blinded to the stage/treatment manually corrected the binary images using GIMP to accurately reflect the vessel morphology. Corrected images were inputted into AngioTool (Zudaire et al., 2011) to perform quantitative vessel analysis. Cropped images were 176 µm×212 µm (width×height) in Fig. 2 and 135 µm×426 µm (width×height) in Fig. 6.

### Quantification of innervated bony rays

z-projections of composite *Tg(sp7:mCherry-NTR)*, acTub images were used to measure the number of innervated bony rays in a given fin. A bony ray was considered ‘innervated’ if an axon traveled ≥50 µm through the intra-ray space. z-stacks of the composite images were used to confirm that the axons were traveling in between the hemirays, not above the rays in the epidermis.

### Quantification of axon density

z-projections of acTub images were cropped perpendicular to hypural diastema and binarized with the IsoData threshold preset in Fiji. Axon density was quantified from these binary images using the percentage area measurement in Fiji. Cropped images were 255 µm×605 µm (width×height) in Fig. 5 and 213 µm×605 µm (width×height) in Fig. 6.

### Quantification of fin area

Fin area was measured using the polygon tool in IC Measure on digital images acquired on a Stemi 508 stereoscope. The proximal limit of the polygon was defined as a line along the dorsal-ventral axis positioned 0.5 mm anterior to the distal-most portion of the notochord.

### Statistical analyses

Scatter plots and box plots were generated with the R (<https://www.r-project.org/>) package ggplot2. For box plots, each graph possesses a black line within the box that represents the median, two hinges for the first and third quartiles, two whiskers that extend no further than 1.5\* (interquartile range) from the adjacent hinge, and outlying points plotted individually beyond the whiskers. Linear regression lines and R squared values were computed in R (ggplot, method=lm). The local polynomial regression fit in Fig. 4J was generated using the LOESS method. Two-sided Wilcoxon rank sum tests were performed in R using the wilcox.test function. Analysis of covariance (ANCOVA) between groups was computed in R using the aov function. In

instances where the input data violated the homogeneity of regression slopes assumption of ANCOVA, the Johnson–Neyman technique was used (R function sim\_slopes). Sample sizes were not predefined and are reported for each experiment. No data points were excluded.

### Acknowledgements

We thank the LSB Aquatics staff for animal care; Wai Pang Chan for imaging support; the lab of Horacio de la Iglesia for cryostat training and use; the lab of Sharlene Santana for access to computer hardware; the labs of Ajay Dhaka, Ronald Kwon, David Raible and Alvaro Sagasti for sharing zebrafish stocks; and Ronald Kwon for comments on an earlier version of the manuscript. The authors are grateful to all members of the Rasmussen lab for discussion, technical assistance, and support.

### Competing interests

The authors declare no competing or financial interests.

### Author contributions

Conceptualization: R.G.B., J.P.R.; Methodology: R.G.B.; Formal analysis: R.G.B., C.E.A.G., E.C.H.; Investigation: R.G.B.; Writing - original draft: R.G.B.; Writing - review & editing: R.G.B., J.P.R.; Visualization: R.G.B., C.E.A.G.; Supervision: J.P.R.; Project administration: J.P.R.; Funding acquisition: R.G.B., J.P.R.

### Funding

This investigation was supported in part by Public Health Service, National Research Service Award from the National Institute of General Medical Sciences (T32 GM007270 to R.G.B.) and funds from the University of Washington (to J.P.R.). J.P.R. is a Washington Research Foundation Distinguished Investigator. Deposited in PMC for release after 12 months.

### Peer review history

The peer review history is available online at <https://journals.biologists.com/dev/article-lookup/doi/10.1242/dev.200172>.

### References

- Akbareian, S. E., Pitsillides, A. A., Macharia, R. G. and McGonnell, I. M. (2015). Occipital foramina development involves localised regulation of mesenchyme proliferation and is independent of apoptosis. *J. Anat.* **226**, 560–574. doi:10.1111/joa.12304
- Akiva, A., Nelkenbaum, O., Schertel, A., Yaniv, K., Weiner, S. and Addadi, L. (2019). Intercellular pathways from the vasculature to the forming bone in the zebrafish larval caudal fin: Possible role in bone formation. *J. Struct. Biol.* **206**, 139–148. doi:10.1016/j.jsb.2019.02.011
- Andermann, P., Ungos, J. and Raible, D. W. (2002). Neurogenin1 defines zebrafish cranial sensory ganglia precursors. *Dev. Biol.* **251**, 45–58. doi:10.1006/dbio.2002.0820
- Bar-On, E., Weigl, D., Parvari, R., Katz, K., Weitz, R. and Steinberg, T. (2002). Congenital insensitivity to pain. Orthopaedic manifestations. *J. Bone Joint Surg. Br.* **84**, 252–257. doi:10.1302/0301-620X.84B2.0840252
- Bayliss, P. E., Bellavance, K. L., Whitehead, G. G., Abrams, J. M., Aegerter, S., Robbins, H. S., Cowan, D. B., Keating, M. T., O'Reilly, T., Wood, J. M. et al. (2006). Chemical modulation of receptor signaling inhibits regenerative angiogenesis in adult zebrafish. *Nat. Chem. Biol.* **2**, 265–273. doi:10.1038/nchembio778
- Becerra, J., Montes, G. S., Bexiga, S. R. and Junqueira, L. C. (1983). Structure of the tail fin in teleosts. *Cell Tissue Res.* **230**, 127–137. doi:10.1007/BF00216033
- Berthold, A. A. (1831). Über das Wachstum, den abfall und die wiedererzeugung der Hirschgeweihe. *Anat. Zool. U Physiol.* **5**, 39–96.
- Bird, N. C. and Mabey, P. M. (2003). Developmental morphology of the axial skeleton of the zebrafish, *Danio rerio* (Ostariophysi: Cyprinidae). *Dev. Dyn. Off. Publ. Am. Assoc. Anat.* **228**, 337–357.
- Brown, A. M., Fisher, S. and Iovine, M. K. (2009). Osteoblast maturation occurs in overlapping proximal-distal compartments during fin regeneration in zebrafish. *Dev. Dyn. Off. Publ. Am. Assoc. Anat.* **238**, 2922–2928.
- Chan, J., Bayliss, P. E., Wood, J. M. and Roberts, T. M. (2002). Dissection of angiogenic signaling in zebrafish using a chemical genetic approach. *Cancer Cell* **1**, 257–267. doi:10.1016/S1535-6108(02)00042-9
- Chen, H., Hu, B., Lv, X., Zhu, S., Zhen, G., Wan, M., Jain, A., Gao, B., Chai, Y., Yang, M. et al. (2019). Prostaglandin E2 mediates sensory nerve regulation of bone homeostasis. *Nat. Commun.* **10**, 181. doi:10.1038/s41467-018-08097-7
- Cornell, R. A. and Eisen, J. S. (2002). Delta/Notch signaling promotes formation of zebrafish neural crest by repressing Neurogenin 1 function. *Dev. Camb. Engl.* **129**, 2639–2648. doi:10.1242/dev.129.11.2639
- DeLaurier, A., Eames, B. F., Blanco-Sánchez, B., Peng, G., He, X., Swartz, M. E., Ullmann, B., Westerfield, M. and Kimmel, C. B. (2010). Zebrafish *sp7:EGFP*: a



- transgenic for studying otic vesicle formation, skeletogenesis, and bone regeneration. *Genes. N. Y. N* 2000 **48**, 505-511. doi:10.1002/dvg.20639
- Dodo, Y., Chatani, M., Azetsu, Y., Hosonuma, M., Karakawa, A., Sakai, N., Negishi-Koga, T., Tsuji, M., Inagaki, K., Kiuchi, Y. et al. (2020). Myelination during fracture healing in vivo in myelin protein zero (p0) transgenic medaka line. *Bone* **133**, 115225. doi:10.1016/j.bone.2020.115225
- Durán, I., Mari-Beffa, M., Santamaría, J. A., Becerra, J. and Santos-Ruiz, L. (2011). Actinotrichia collagens and their role in fin formation. *Dev. Biol.* **354**, 160-172. doi:10.1016/j.ydbio.2011.03.014
- Esancy, K., Condon, L., Feng, J., Kimball, C., Curtright, A. and Dhaka, A. (2018). A zebrafish and mouse model for selective pruritus via direct activation of TRPA1. *eLife* **7**, e32036. doi:10.7554/eLife.32036
- Gau, P., Poon, J., Ufret-Vincenty, C., Snelson, C. D., Gordon, S. E., Raible, D. W. and Dhaka, A. (2013). The zebrafish ortholog of TRPV1 is required for heat-induced locomotion. *J. Neurosci. Off. J. Soc. Neurosci.* **33**, 5249-5260. doi:10.1523/JNEUROSCI.5403-12.2013
- Geraudie, J. and Singer, M. (1985). Necessity of an adequate nerve supply for regeneration of the amputated pectoral fin in the teleost *Fundulus*. *J. Exp. Zool.* **234**, 367-374. doi:10.1002/jez.1402340306
- Hausman, M. R., Schaffler, M. B. and Majeska, R. J. (2001). Prevention of fracture healing in rats by an inhibitor of angiogenesis. *Bone* **29**, 560-564. doi:10.1016/S8756-3282(01)00608-1
- Honjo, Y., Kniss, J. and Eisen, J. S. (2008). Neuregulin-mediated ErbB3 signaling is required for formation of zebrafish dorsal root ganglion neurons. *Dev. Camb. Engl.* **135**, 2615-2625. doi:10.1242/dev.022178
- Huang, C., Wang, T.-C., Lin, B.-H., Wang, Y.-W., Johnson, S. L. and Yu, J. (2009). Collagen IX is required for the integrity of collagen II fibrils and the regulation of vascular plexus formation in Zebrafish caudal fins. *Dev. Biol.* **332**, 360-370. doi:10.1016/j.ydbio.2009.06.003
- Johansson, R. S. and Valbo, A. B. (1979). Tactile sensibility in the human hand: relative and absolute densities of four types of mechanoreceptive units in glabrous skin. *J. Physiol.* **286**, 283-300. doi:10.1113/jphysiol.1979.sp012619
- Johnson, S. L. and Weston, J. A. (1995). Temperature-sensitive mutations that cause stage-specific defects in Zebrafish fin regeneration. *Genetics* **141**, 1583-1595. doi:10.1093/genetics/141.4.1583
- Kague, E., Gallagher, M., Burke, S., Parsons, M., Franz-Odenaal, T. and Fisher, S. (2012). Skeletogenic fate of zebrafish cranial and trunk neural crest. *PLoS ONE* **7**, e47394. doi:10.1371/journal.pone.0047394
- Knopf, F., Hammond, C., Chekuru, A., Kurth, T., Hans, S., Weber, C. W., Mahatma, G., Fisher, S., Brand, M., Schulte-Merker, S. et al. (2011). Bone regenerates via dedifferentiation of osteoblasts in the zebrafish fin. *Dev. Cell* **20**, 713-724. doi:10.1016/j.devcel.2011.04.014
- Kobayashi, I., Kobayashi-Sun, J., Kim, A. D., Pouget, C., Fujita, N., Suda, T. and Traver, D. (2014). Jam1a-Jam2a interactions regulate haematopoietic stem cell fate through Notch signalling. *Nature* **512**, 319-323. doi:10.1038/nature13623
- König, D., Dagenais, P., Senk, A., Djonov, V., Aegerter, C. M. and Jaźwińska, A. (2019). Distribution and restoration of serotonin-immunoreactive paraneuronal cells during caudal fin regeneration in zebrafish. *Front. Mol. Neurosci.* **12**, 227. doi:10.3389/fnmol.2019.00227
- Kragl, M., Knapp, D., Nacu, E., Khattak, S., Maden, M., Epperlein, H. H. and Tanaka, E. M. (2009). Cells keep a memory of their tissue origin during axolotl limb regeneration. *Nature* **460**, 60-65. doi:10.1038/nature08152
- Lawson, N. D. and Weinstein, B. M. (2002). In vivo imaging of embryonic vascular development using transgenic zebrafish. *Dev. Biol.* **248**, 307-318. doi:10.1006/dbio.2002.0711
- Lee, R. T. H., Thierry, J. P. and Carney, T. J. (2013). Dermal fin rays and scales derive from mesoderm, not neural crest. *Curr. Biol.* **23**, R336-R337. doi:10.1016/j.cub.2013.02.055
- Li, W., Kohara, H., Uchida, Y., James, J. M., Soneji, K., Cronshaw, D. G., Zou, Y.-R., Nagasawa, T. and Mukoyama, Y.-S. (2013). Peripheral nerve-derived CXCL12 and VEGF-A regulate the patterning of arterial vessel branching in developing limb skin. *Dev. Cell* **24**, 359-371. doi:10.1016/j.devcel.2013.01.009
- Lisse, T. S., Middleton, L. J., Pellegrini, A. D., Martin, P. B., Spaulding, E. L., Lopes, O., Brochu, E. A., Carter, E. V., Waldron, A. and Rieger, S. (2016). Paclitaxel-induced epithelial damage and ectopic MMP-13 expression promotes neurotoxicity in zebrafish. *Proc. Natl. Acad. Sci. U. S. A.* **113**, E2189-E2198. doi:10.1073/pnas.1525096113
- Lyons, D. A., Pogoda, H.-M., Voas, M. G., Woods, I. G., Diamond, B., Nix, R., Arana, N., Jacobs, J. and Talbot, W. S. (2005). *erbb3* and *erbb2* are essential for schwann cell migration and myelination in zebrafish. *Curr. Biol. CB* **15**, 513-524. doi:10.1016/j.cub.2005.02.030
- Makanae, A., Tajika, Y., Nishimura, K., Saito, N., Tanaka, J. and Satoh, A. (2020). Neural regulation in tooth regeneration of *Ambystoma mexicanum*. *Sci. Rep.* **10**, 9323. doi:10.1038/s41598-020-66142-2
- Martin, P. and Lewis, J. (1989). Origins of the neurovascular bundle: interactions between developing nerves and blood vessels in embryonic chick skin. *Int. J. Dev. Biol.* **33**, 379-387.
- McGraw, H. F., Nechiporuk, A. and Raible, D. W. (2008). Zebrafish dorsal root ganglia neural precursor cells adopt a glial fate in the absence of neurogenin1. *J. Neurosci. Off. J. Soc. Neurosci.* **28**, 12558-12569. doi:10.1523/JNEUROSCI.2079-08.2008
- McGraw, H. F., Snelson, C. D., Prendergast, A., Suli, A. and Raible, D. W. (2012). Postembryonic neuronal addition in zebrafish dorsal root ganglia is regulated by Notch signaling. *Neural Develop.* **7**, 23. doi:10.1186/1749-8104-7-23
- Metcalfe, W. K., Myers, P. Z., Trevarrow, B., Bass, M. B. and Kimmel, C. B. (1990). Primary neurons that express the L2/HNK-1 carbohydrate during early development in the zebrafish. *Dev. Camb. Engl.* **110**, 491-504. doi:10.1242/dev.110.2.491
- Mifsud, M., Spiteri, M., Camilleri, K., Bonello, M., Azzopardi, T. and Abela, M. (2019). The orthopedic manifestations of congenital insensitivity to pain: a population-based study. *Indian J. Orthop.* **53**, 665-673. doi:10.4103/ortho.IJOrtho\_378\_18
- Montes, G., Becerra, J., Toledo, O., Gordilho, M. and Junqueira, L. (1982). Fine structure and histochemistry of the tail fin ray in teleosts. *Histochemistry* **75**, 363-376. doi:10.1007/BF00496739
- Mukoyama, Y., Shin, D., Britsch, S., Taniguchi, M. and Anderson, D. J. (2002). Sensory nerves determine the pattern of arterial differentiation and blood vessel branching in the skin. *Cell* **109**, 693-705. doi:10.1016/S0092-8674(02)00757-2
- Mukoyama, Y.-S., Gerber, H.-P., Ferrara, N., Gu, C. and Anderson, D. J. (2005). Peripheral nerve-derived VEGF promotes arterial differentiation via neuropilin 1-mediated positive feedback. *Dev. Camb. Engl.* **132**, 941-952. doi:10.1242/dev.01675
- Palanca, A. M. S., Lee, S.-L., Yee, L. E., Joe-Wong, C., Trinh, L. A., Hiroyasu, E., Husain, M., Fraser, S. E., Pellegrini, M. and Sagasti, A. (2013). New transgenic reporters identify somatosensory neuron subtypes in larval zebrafish. *Dev. Neurobiol.* **73**, 152-167. doi:10.1002/dneu.22049
- Pan, Y. A., Choy, M., Prober, D. A. and Schier, A. F. (2012). Robo2 determines subtype-specific axonal projections of trigeminal sensory neurons. *Dev. Camb. Engl.* **139**, 591-600. doi:10.1242/dev.076588
- Parichy, D. M., Elizondo, M. R., Mills, M. G., Gordon, T. N. and Engeszer, R. E. (2009). Normal table of post-embryonic zebrafish development: staging by externally visible anatomy of the Living Fish. *Dev. Dyn. Off. Publ. Am. Assoc. Anat.* **238**, 2975-3015. doi:10.1002/dvdy.22113
- Paulissen, S., Castranova, D., Krispin, S., Burns, M. and Weinstein, B. M. (2021). Anatomy and development of the pectoral fin vascular network in the Zebrafish. *bioRxiv*. doi:10.1101/2021.04.02.437283
- Petrie, T. A., Strand, N. S., Yang, C.-T., Tsung-Yang, C., Rabinowitz, J. S. and Moon, R. T. (2014). Macrophages modulate adult zebrafish tail fin regeneration. *Dev. Camb. Engl.* **141**, 2581-2591. doi:10.1242/dev.098459
- Pfefferli, C. and Jaźwińska, A. (2015). The art of fin regeneration in zebrafish. *Regen. Oxf. Engl.* **2**, 72-83. doi:10.1002/reg2.33
- Poss, K. D., Keating, M. T. and Nechiporuk, A. (2003). Tales of regeneration in zebrafish. *Dev. Dyn.* **226**, 202-210. doi:10.1002/dvdy.10220
- Prober, D. A., Zimmerman, S., Myers, B. R., McDermott, B. M., Kim, S.-H., Caron, S., Rihel, J., Solnica-Krezel, L., Julius, D., Hudspeth, A. J. et al. (2008). Zebrafish TRPA1 channels are required for chemosensation but not for thermosensation or mechanosensory hair cell function. *J. Neurosci. Off. J. Soc. Neurosci.* **28**, 10102-10110. doi:10.1523/JNEUROSCI.2740-08.2008
- Rasmussen, J. P., Vo, N.-T. and Sagasti, A. (2018). Fish scales dictate the pattern of adult skin innervation and vascularization. *Dev. Cell* **46**, 344-359. doi:10.1016/j.devcel.2018.06.019
- Recidoro, A. M., Roof, A. C., Schmitt, M., Worton, L. E., Petrie, T., Strand, N., Auk, B. J., Srinivasan, S., Moon, R. T., Gardiner, E. M. et al. (2014). Botulinum toxin induces muscle paralysis and inhibits bone regeneration in zebrafish. *J. Bone Miner. Res. Off. J. Am. Soc. Bone Miner. Res.* **29**, 2346-2356. doi:10.1002/jbmr.2274
- Rieger, S. and Sagasti, A. (2011). Hydrogen peroxide promotes injury-induced peripheral sensory axon regeneration in the zebrafish skin. *PLoS Biol.* **9**, e1000621. doi:10.1371/journal.pbio.1000621
- Schneider, H. and Sulner, B. (2006). Innervation of dorsal and caudal fin muscles in adult zebrafish *Danio rerio*. *J. Comp. Neurol.* **497**, 702-716. doi:10.1002/cne.21038
- Segarra, M., Aburto, M. R., Hefendehl, J. and Acker-Palmer, A. (2019). Neurovascular Interactions in the Nervous System. *Annu. Rev. Cell Dev. Biol.* **35**, 615-635. doi:10.1146/annurev-cellbio-100818-125142
- Seifert, A. W., Kiams, S. G., Seifert, M. G., Goheen, J. R., Palmer, T. M. and Maden, M. (2012). Skin shedding and tissue regeneration in African spiny mice (*Acomys*). *Nature* **489**, 561-565. doi:10.1038/nature11499
- Senk, A. and Djonov, V. (2021). Collagen fibers provide guidance cues for capillary growth during regenerative angiogenesis in zebrafish. *Sci. Rep.* **11**, 19520. doi:10.1038/s41598-021-98852-6
- Shadad, O., Chaulagair, R., Luukko, K. and Kettunen, P. (2019). Establishment of tooth blood supply and innervation is developmentally regulated and takes place through differential patterning processes. *J. Anat.* **234**, 465-479. doi:10.1111/joa.12950
- Simões, M. G., Bensimon-Brito, A., Fonseca, M., Farinho, A., Valério, F., Sousa, S., Afonso, N., Kumar, A. and Jacinto, A. (2014). Denervation impairs regeneration of amputated zebrafish fins. *BMC Dev. Biol.* **14**, 49. doi:10.1186/s12861-014-0049-2

- Singh, S. P., Holdway, J. E. and Poss, K. D. (2012). Regeneration of amputated zebrafish fin rays from de novo osteoblasts. *Dev. Cell* **22**, 879-886. doi:10.1016/j.devcel.2012.03.006
- Street, J., Bao, M., deGuzman, L., Bunting, S., Peale, F. V., Ferrara, N., Steinmetz, H., Hoeffel, J., Cleland, J. L., Daugherty, A. et al. (2002). Vascular endothelial growth factor stimulates bone repair by promoting angiogenesis and bone turnover. *Proc. Natl. Acad. Sci. U. S. A.* **99**, 9656-9661. doi:10.1073/pnas.152324099
- Suttie, J. M. and Fennessy, P. F. (1985). Regrowth of amputated velvet antlers with and without innervation. *J. Exp. Zool.* **234**, 359-366. doi:10.1002/jez.1402340305
- Tomlinson, R. E., Li, Z., Zhang, Q., Goh, B. C., Li, Z., Thorek, D. L. J., Rajbhandari, L., Brushart, T. M., Minichiello, L., Zhou, F. et al. (2016). NGF-TrkA signaling by sensory nerves coordinates the vascularization and ossification of developing endochondral bone. *Cell Rep.* **16**, 2723-2735. doi:10.1016/j.celrep.2016.08.002
- Tu, S. and Johnson, S. L. (2011). Fate restriction in the growing and regenerating Zebrafish fin. *Dev. Cell* **20**, 725-732. doi:10.1016/j.devcel.2011.04.013
- Uchida, D., Yamashita, M., Kitano, T. and Iguchi, T. (2002). Oocyte apoptosis during the transition from ovary-like tissue to testes during sex differentiation of juvenile zebrafish. *J. Exp. Biol.* **205**, 711-718. doi:10.1242/jeb.205.6.711
- Vanhollebeke, B., Stone, O. A., Bostaille, N., Cho, C., Zhou, Y., Maquet, E., Gauquier, A., Cabochette, P., Fukuhara, S., Mochizuki, N. et al. (2015). Tip cell-specific requirement for an atypical Gpr124- and Reck-dependent Wnt/ $\beta$ -catenin pathway during brain angiogenesis. *eLife* **4**, e06489. doi:10.7554/eLife.06489
- Weissengruber, G. E., Egerbacher, M. and Forstenpointner, G. (2005). Structure and innervation of the tusk pulp in the African elephant (*Loxodonta africana*). *J. Anat.* **206**, 387-393. doi:10.1111/j.1469-7580.2005.00401.x
- Williams, K. and Ribera, A. B. (2020). Long-lived zebrafish Rohon-Beard cells. *Dev. Biol.* **464**, 45-52. doi:10.1016/j.ydbio.2020.05.003
- Wislocki, G. B. and Singer, M. (1946). The occurrence and function of nerves in the growing antlers of deer. *J. Comp. Neurol.* **85**, 1-19. doi:10.1002/cne.900850102
- Xu, C., Hasan, S. S., Schmidt, I., Rocha, S. F., Pitulescu, M. E., Busmann, J., Meyen, D., Raz, E., Adams, R. H. and Siekmann, A. F. (2014). Arteries are formed by vein-derived endothelial tip cells. *Nat. Commun.* **5**, 5758. doi:10.1038/ncomms6758
- Zudaire, E., Gambardella, L., Kurcz, C. and Vermeren, S. (2011). A computational tool for quantitative analysis of vascular networks. *PLoS ONE* **6**, e27385. doi:10.1371/journal.pone.0027385
